# Supplementary material for: High Reynolds investigations on the ability of the full scale e-TellTale sensor to detect flow separation on a wind turbine blade section
Source: Copernicus journal article supplement (doi:10.5194/wes-2021-4), 2021-05-17
Supplement: Supplementary file [file wes-2021-4-AC1-supplement.pdf]

# Response to reviewers, paper wes-2021-4

Antoine Soulier, Caroline Braud, Dimitri Voisin, and Danbon Frédéric

## 1 Referee # 1

### General comments

In this manuscript, the authors intend to show the ability of the full scale e-Telltale sensor to detect the separation state of the flow on turbine blades.

5           The wind tunnel experiment of 2D NACA 65<sub>4</sub>—421 with 0.693m in chord length was conducted at Reynolds number of  $8.85 \cdot 10^5$  with pressure measurement. Several configurations of e-Telltale sensor are tested on the surface and the signal was measured for each configuration. The result shows that the sensors are able to detect the separation states from both leading edge and trailing edge. It is also found that its sensitivity for different states are depend on its configuration.

10           This work presents an important evaluation of the innovative device for the progress of the sophisticated turbine control including active flow control technologies on the blade.

I strongly recommend this paper for publication with however revised to raise the reliability of the work. I hope the following comments help the authors for their revision.

### Specific comments

15           **Q1 :** The authors failed to convince readers the above explanation in Section 3 because there are no data. The authors should show the pressure distribution taken in this experiment to show the flow separation state for each slope of Cl.

The mean pressure distribution corresponding to the Cl curve has been added as suggested. Descriptions related to these quantities have been updated accordingly and shown in red in the final document. It should be emphasized that this description is only there to give a rough description of the stall scenario as it highly depends on the airfoil shape as found by the early study of Gault (1957).

20           **Q2 :** The inconsistency between Cls in Figure 8, 9 is also confusing for the readers to believe the reliability of this manuscript.

Thank you for noticing. The inconsistency comes from two main problems. The first confusion is due to an AoA correction we unfortunately did not reported in the figures of the original manuscript. The other inconsistency comes from the use of two distinct wind tunnel campaigns in the manuscript. As shown in figure 2, one campaign is relatively well 2D, the other one (figure 1 below) exhibit more 3D effects in the spanwise direction. As recalled in the final article, as soon as the flow separates, the flow becomes 3D (see e.g. Manolesos et al. (2014)), leading to lift discrepancies, which origin are still under investigation (see e.g. Olsen et al. (2020)). In the present study, it is though that changing the e-Telltale configuration modify slightly the blade shape and thus the lift level. However, understanding these 3D effects is out of the scope of the present paper.

In order to be consistent in the description of the e-Telltale sensor's response, the simultaneous and local measure of the CL curve (via the closest pressure measurements) is now shown instead of the spanwise averaged CL value. However, for a rough presentation of stalled scenario of the present blade shape (see e.g. Gault (1957) for example of stall scenario with the Reynolds number and the airfoil geometry), the averaged CL value for the two campaign test is presented in section 3.

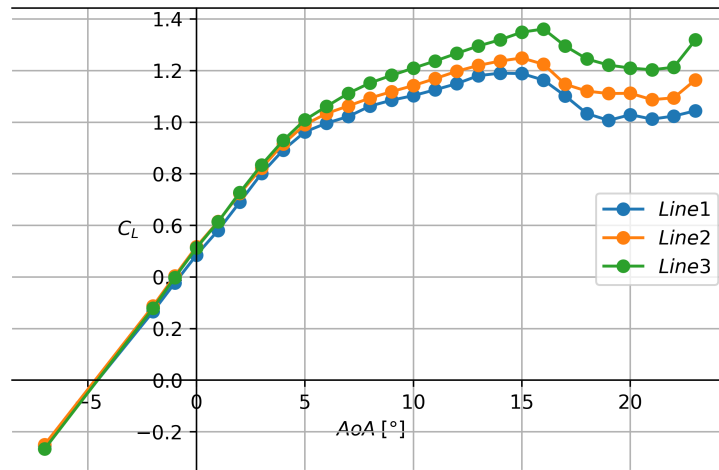

**Figure 1.** Lift coefficient of 3 lines with out e-Telltales, selected wind tunnel test campaign

**Q3 :** Cl's for Figure 10-12 seems to use the same data. The authors should show measured Cl slope for each experiment as explained in 1.126 to show the ability of the sensor to detect the slope for each configuration. Otherwise, the authors should show the slope for each configuration are the same in another Figure.

The plot have been changed, for each e-Telltale configuration, the corresponding Cl is now presented

**Q4 :** The authors should explain some features in Figures to make them reliable. For Figure 12, the authors should explain the reason why the Mean LENS signal is 0.1 for low AoAs

The offset of the sensor signal is really sensitive to its environment as the way it is mounted. This is why the analysis focuses on the changes of slope and the main features of the curve.

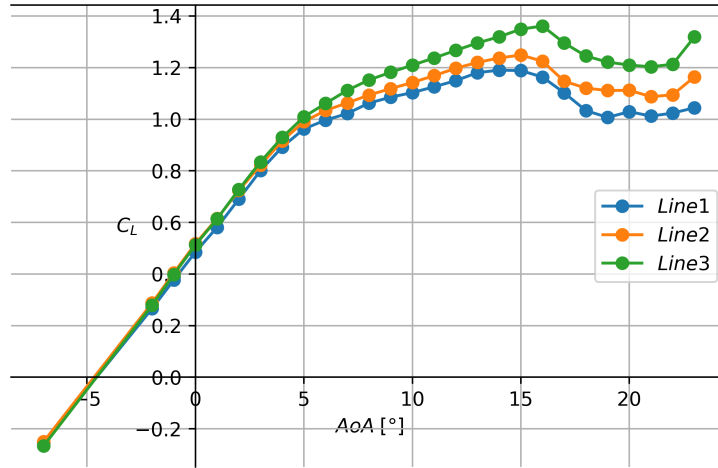

**Figure 2.** Lift coefficient of 3 lines with out e-Telltales, former version, non-selected wind tunnel test campaign

**Q5 :** For Figure 13, the authors should explain the possibility of interaction of the Shell of the sensor for the Standard deviation of TENSS signal at low AoAs

The interaction of the shell with the sensor is not raised in the article because no data could either confirm or deny the effects of the interaction. However what have been observed at least visually is that the behavior of the silicon strip is significantly different between a shell and a no shell e-Telltale. To go further into this analysis, additional dedicated measurements are needed such as 3D drag measurements or/and spatio-temporal measure of the flow field together with a measure of the strip movement, similarly as what has been performed at a lower scale experiment (see Soulier et al. (2021a)). This is however out of the scope of the present paper.

**Technical corrections** The technical corrections have been treated directly in the manuscript

## 2 Referee #2

**Q6 :** In section 2.3, line 64, the authors mention, that the measuring time was either 1 or 2 minutes. An explanation for the two different measuring times should be given and the approach how to calculate comparable standard deviations from different measuring times should be made clear to the readers.

As explained in answer Q2 from the first reviewer, results from several wind tunnel test sessions were used in the former version of the manuscript. For this updated version, data from a unique wind tunnel campaign are used, all the signals were acquired with a duration of 2 minutes. It has been updated in the manuscript.

**Q7 :** On page 6, fig.4, a picture of the device with shell is presented. Since most of the results focus on the no-shell version, a picture of this setup should be included to provide the reader an improved understanding.

60 The figure has been modified with an additional picture of the no-shell case.

**Q7 :** On page 6, lines 92ff, the authors mention, that a version of the used blade profile with modified trailing edge has been used in other research. The relevance of this information is unclear and it should either be explained or omitted.

It has no specific relevance and has been omitted as suggested by the reviewer.

**Q8 :** On page 8, line 102, the authors claim that the flow is transitioning from separated state to attached state between  
65 AoAs of  $6^\circ$  to  $8^\circ$ . With increasing AoA the transition should be towards flow separation.

Thank you for noticing. This error has been corrected in the manuscript

**Q9 :** On page 8, line 105, the authors mention, that flow separation moves progressively towards the LE up to an AoA of  $18^\circ$ . The decrease in CL is already starting at  $18^\circ$  (fig. 8), though.

We agree with the reviewer, the AoA of  $18^\circ$  is, in this case, not the good one, the stall begin at the AoA of  $17^\circ$  corresponding,  
70 to the maximum lift. This have been changed in the manuscript.

**Q10 :** The lift coefficients derived from the pressure taps in fig.8 deviate from the lift curves for the two cases with and without the mounted device in fig 9. Figure 9 shows a later transition to a lower slope in the linear region ( $6^\circ$  vs.  $7^\circ$ ) and also shows a higher maximum CL ( $<1.2$  vs.  $>1.2$ ). This leaves the readers with some questions about the reproducibility and reliability of the results. The authors should discuss these deviations and give an explanation. Also, since the device is mounted  
75 between two lines of 1 pressure taps, the comparison of lift curves for individual lines of pressure taps instead of just averaged data would add value.

Please refer to our answer of Q2 from the referee #1

**Q11 :** In section 4.3 on page 11 the authors discuss the performance of the sensor when applied close to the leading  
80 edge. The finding of no detected separation for low AoAs should be expected, since the sensor is mounted in the region of the blade profile, where the flow is still attached. The finding seems obvious and this should be mentioned. The same holds for the finding, that separation close to the LE is detected once the AoA increases.

Thank you the advice, it has been added in the final version.

**Q12 :** The description of the impact of the shell in section 4.4 is very brief and superficial. From fig. 13 it is clearly  
85 visible, that the shell impacts the flow and thus the signal of the sensor. It can be expected, that the shell impact results in higher standard deviations for low AoAs. However, it is not clear why the signal is higher for fully separated flow in high AoA cases. No shell effect should be expected once the shell is located in the fully separated region. The authors unfortunately do not address the visible effects besides mentioning higher signal and standard deviation values for the shell case. A hypothesis



and possible explanation of the effects would be helpful here. Unless this is addressed, this section provides no meaningful value to the paper and should be omitted.

It is true that we cannot explain the differences between the two configurations with the available measurements. However, it is still interesting to point-out that the differences, that cannot be seen in the lift level (figure 10), are so strong in the e-Telltale signal. Too many parameters are involved here to conclude. It should however be noticed that the strip of the e-Telltale in the integrated case was observed to have difficulties to initiate a movement. This may be attributed to a complex interaction between the boundary layer with the cavity in which the sensor is integrated. More dedicated measurements are needed for further understanding. This hypothesis is addressed in the final document

**Q13 :** In the final sentence of the conclusion (p.13, line 202f), the authors claim, that the sensor with shell is also capable of detecting the TE separation angle and stall angle. This conclusion is not fully supported by the plots in fig. 13 and the brief mention in section 4.4. While the local maximum of the standard deviation and the first increase of the signal value seem to be an indicator for TE separation, these increases occur with a slight delay compared to the CL curve used as a reference. The authors should be more precise in distinguishing the results for the different setups.

The reviewer raised an interesting question that we unfortunately cannot answer with the available measurements. Indeed, if the pressure distribution is able to tell us when the flow separates, we do not have any information on the motion of the e-Telltale strip within the flow field, which prescribe any understanding of this sensor response delay. This is something we addressed at lower scale for the second peak of the e-Telltale signal (stall phenomena), with analysis of the strip motion using TRPIV measurements (Soulier et al., 2021b). Dedicated measurements should be performed for further investigations of this delay.

**Technical corrections** The technical corrections have been treated directly in the manuscript

## References

- 110 Gault, D. E.: A correlation of low-speed airfoil-section stalling characteristics with Reynolds number and airfoil geometry, Tech. Rep. Technical note 3963, National Advisory Committee for Aeronautics, 1957.
- Manolesos, M., Papadakis, G., and Voutsinas, S.: An experimental and numerical investigation on the formation of stall-cells on airfoils, *Journal of Physics: Conference Series*, 555, 012 068, <https://doi.org/10.1088/1742-6596/555/1/012068>, <https://doi.org/10.1088/1742-6596/555/1/012068>, publisher: IOP Publishing, 2014.
- 115 Olsen, A. S., Sørensen, N. N., Bak, C., Gaunaa, M., Mikkelsen, R., Fischer, A., Beckerlee, J., and Ildvedsen, S.: Why is the measured maximum lift in wind tunnels dependent on the measurement method?, *Journal of Physics: Conference Series*, 1618, 032 040, <https://doi.org/10.1088/1742-6596/1618/3/032040>, <https://doi.org/10.1088/1742-6596/1618/3/032040>, publisher: IOP Publishing, 2020.
- Soulier, A., Braud, C., Voisin, D., and Podvin, B.: Low-Reynolds-number investigations on the ability of the strip of e-TellTale sensor to detect the flow features over wind turbine blade section: flow stall and reattachment dynamics, *Wind Energy Science*, 6, 409–426, <https://doi.org/10.5194/wes-6-409-2021>, <https://wes.copernicus.org/articles/6/409/2021/>, 2021a.
- 120 Soulier, A., Braud, C., Voisin, D., and Podvin, B.: Low-Reynolds-number investigations on the ability of the strip of e-TellTale sensor to detect the flow features over wind turbine blade section: flow stall and reattachment dynamics, *Wind Energy Science*, 6, 409–426, <https://doi.org/10.5194/wes-6-409-2021>, <https://wes.copernicus.org/articles/6/409/2021/>, 2021b.

# High Reynolds number investigations on the ability of the full scale e-Telltale sensor to detect flow separation on a wind turbine blade section

Antoine Soulier<sup>1,2</sup>, Caroline Braud<sup>2,3</sup>, Dimitri Voisin<sup>1</sup>, and Frédéric Danbon<sup>3</sup>

<sup>1</sup>Mer Agitée, Port-la-Forêt, 29940 La Forêt-Fouesnant

<sup>2</sup>LHEEA lab. (CNRS/Centrale Nantes), 1, rue de la Noë, 44321 Nantes

<sup>3</sup>CSTB, 11 Rue Henri Picherit, 44300 Nantes

**Correspondence:** caroline.braud@ec-nantes.fr

**Abstract.** The complexity of the flow over a wind turbine blade makes its understanding and monitoring a challenging task, especially on operating wind turbines. The innovative e-Telltale sensor is developed for that purpose : detecting the flow separation on wind turbines blades. In this paper, high Reynolds number wind tunnel tests have been performed with different configurations of full scale e-Telltale sensors and wall pressure measurements on a wind turbine blade section. A comparison between the lift curve and the e-Telltale signal was used to evaluate the ability of the sensor to detect flow separation. Results show different interesting properties of the sensor response depending on its size, position along the chord and its fitting process that could be used in real applications.

## 1 Introduction

Increasing the life of wind turbines is one of the major areas of investigation faced by wind farm operators. A cause of premature aging often put forward is the accumulation of loads imposed by the strong shears upstream of the rotor due to an incorrect setting of the wind turbine or to the atmosphere in which it operates (Rezaeiha et al., 2017). In order to limit the influence of these disturbances on the wind turbine, modern pitch-regulated wind turbines are operational today. Sensors currently used are located on the wind turbine nacelle such as cup anemometers (Smaïli and Masson, 2004), on the wind turbine spinner (Pedersen et al., 2015). Upstream flow measurements from a LIDAR mounted nacelle are also under development (Scholbrock et al., 2013). This LIDAR system will predict flow perturbations (gust, misalignment . . . ) before a control action of the blade is performed. The control objective is to alleviate turbine blade lift fluctuations and resulting load fluctuations by an adequate adjustment of the blade incidence. However, measurements at the wind turbine nacelle do not sufficiently take into account the state of the flow on the aerodynamic surfaces (attached/separated, laminar/transitional or turbulent aerodynamic boundary layer . . . ) which is critical to decide a control action. Also, pitch control on very large blades is not fast enough to account for the small time scales from small turbulent structures generated in a wind turbine wake for instance (Chamorro et al., 2012), while they have a strong impact on blade loads (Bartholomay et al.). Having local and robust aerodynamic sensors at the blade scale placed at key areas would be an important step for wind turbine monitoring and operation. Furthermore, they could be

used together with active devices to further decrease local spatio-temporal loads (Shaqarin et al., 2013; Jaunet and Braud, 2018). Swytink-Binnema and Johnson (2016) have demonstrated the possibility to detect aerodynamic flow separation using distributed tufts over the blade surface and a root-blade embedded camera. A simple and robust alternative of this sensor is the use of electronic-Telltale sensors. The system is composed of a silicone strip with a strain gauge at its base. When the silicone strip goes away from the surface, the displacement is measured by the strain gauge. The e-Telltale sensor is already used on sails of some boats and can be glued on the aerodynamic surface of wind turbine blades for retrofitting purposes. First tests of this innovative sensor were conducted at low Reynolds number using a down-scaled device (Soulier et al., 2021).

The strip of the e-Telltale was demonstrated to follow the separation/reattachment dynamics similarly as much more accurate detection methods based on Time Resolved PIV measurements. The present paper extends the investigation on the ability of the e-Telltale sensor to detect the flow separation over airfoil profiles towards the use of a full scale device and high Reynolds number wind tunnel tests (the chord based Reynolds number is  $Re_c = 8.85 \times 10^5$ ). The same 2D blade section was used here (NACA-65<sub>4</sub>-421) and different parameters of the e-Telltale device were investigated, including its position, the strip length and its surface fitting process. The evaluation has been performed at different AoAs and through measurements of three lines of chord-wise pressure taps acquired synchronously with the strain gauge signal of the e-Telltale sensor.

The paper is divided in three main sections. Section 2 describes the experimental set-up, including the description of the wind tunnel facility, the blade manufacturing, the measurements used for the evaluation of e-Telltale sensor and the description of the different e-Telltale configurations. Section 3 describes the aerodynamics of the chosen blade profile, focusing on the flow separation phenomena. The last section present the results including the impact of the strip location, length and fitting process on the sensor signal.

## 2 Experimental Setup

### 2.1 The Wind tunnel

The measurements were performed at Nantes (France), in the NSA return wind tunnel of CSTB<sup>1</sup>. The test section is 20m long with a cross-section of 4 m x 2 m (see figure 1). The turbulence intensity level in this test section is around 1 % and the operating speed of the wind tunnel is set to  $U_\infty = 20 \text{ m/s}$ . At this free stream velocity, the Reynolds number of the flow based on the chord length ( $c = 0.693\text{m}$ ) is  $8.85 \times 10^5$ . The profile was set on a rotating table on its bottom, and guided on the ceiling using a bearing. Three pressure lines were used at different span locations, where measurements were performed, to check the flow bidimensionality in the area of interest (see section 2.3).

### 2.2 Blade manufacturing

The chosen 2D blade section, NACA 65<sub>4</sub>-421, was manufactured to be installed in the wind tunnel facility of CSTB. It was made of a skeleton coated with a supple composite. Details on the blade manufacturing can be found in figure 2. The shape

---

<sup>1</sup><http://www.cstb.fr/en/>

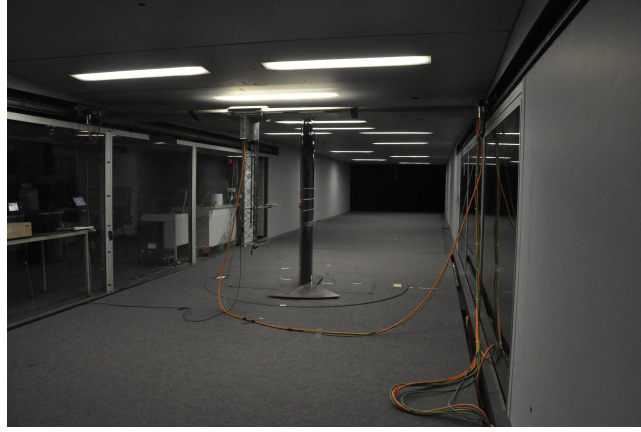

**Figure 1.** The NSA wind tunnel facility of CSTB with the 2D NACA 654-421 blade section installed

of this airfoil profile, already used in previous studies (Sicot et al., 2008; Devinant et al., 2002), is also used in operation on stalled regulated wind turbines.

## 55 2.3 Measurements

The coordinates axis of the present study is  $x$  in the streamwise direction,  $y$  in the cross direction and  $z$  in the spanwise direction perpendicular to the chord line. The origin is taken at the intersection between leading edge and the chord line, in the middle of the blade span (see figure 3). To get the lift coefficient  $C_L$ , three chord-wise lines of pressure taps were distributed around the profile using three 3D printed ribs equipped with 117 pressure sensors each. They were located in the middle of the profile at  $z = 0$ , and  $z \pm 0.173c$  (see figure 3). Copper tubes of 0.8mm internal diameter were flush mounted using pressure tap holes in the 3D printed ribs. Vinyl tubes were then connected to transport the pressure towards ESP 32HD pressure sensors ranging from 0 to 2.5  $kPa$  with a precision of  $\pm 0.03\%$  of the full scale. The cut-off frequency of the total system (tubes plus sensors) was 256  $Hz$ . The signal was low-pass filtered at 256  $Hz$  and acquired at 512  $Hz$ . For each  $AoA$ , the pressure coefficient,  $C_P$ , was calculated and averaged on the duration on the measurement which was 2 minutes, then the lift coefficient  $C_L$  was computed for each line of pressure taps by integration. It has been checked that the statistical convergence of  $C_L$  is reached well before 1 minute. The lift coefficient presented in this study are the results of an average over the three lines of pressure.

## 2.4 E-Telltale sensors

E-Telltale sensors are composed of a silicone strip with a strain gauge sensor at its base, so that it measures displacements of the strip away from the surface (see figure 4). The signal from the strain gauge sensor was amplified with a specialized amplifier (LTC6915). The signal is then filtered with a low-pass analog filter with a cut-off frequency of 160  $Hz$  and a slope of  $-20 dB/decade$ . The filtered signal was then recorded with the same acquisition device than for the pressure measurements.

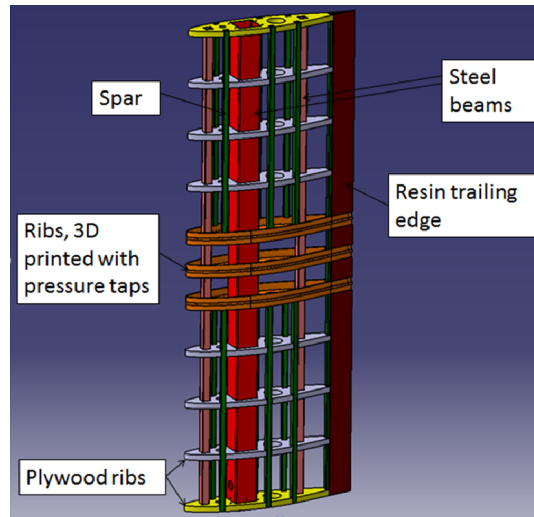

a)

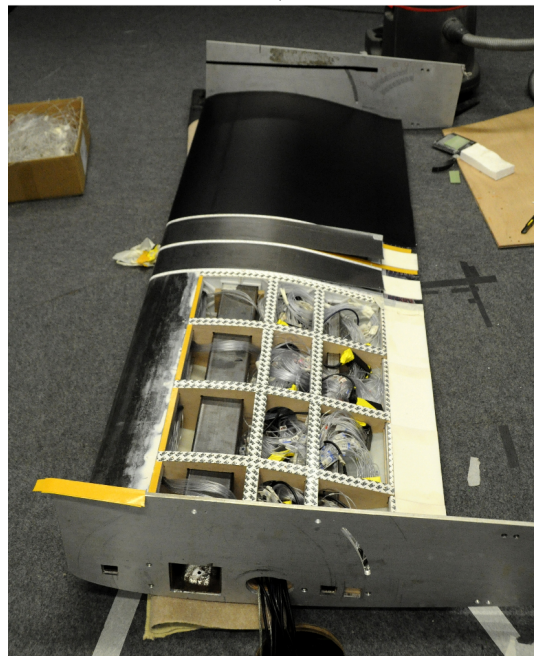

b)

**Figure 2.** The blade manufacturing. a) Elements of the skeleton: 2 steel beams ensure the rigidity, Plywoods ribs are ensuring the blade aerodynamic shape, 3D printed ribs are equipped with pressure taps, The trailing edge is made of resin. b) Picture of the blade with one of the GRP skins removed.

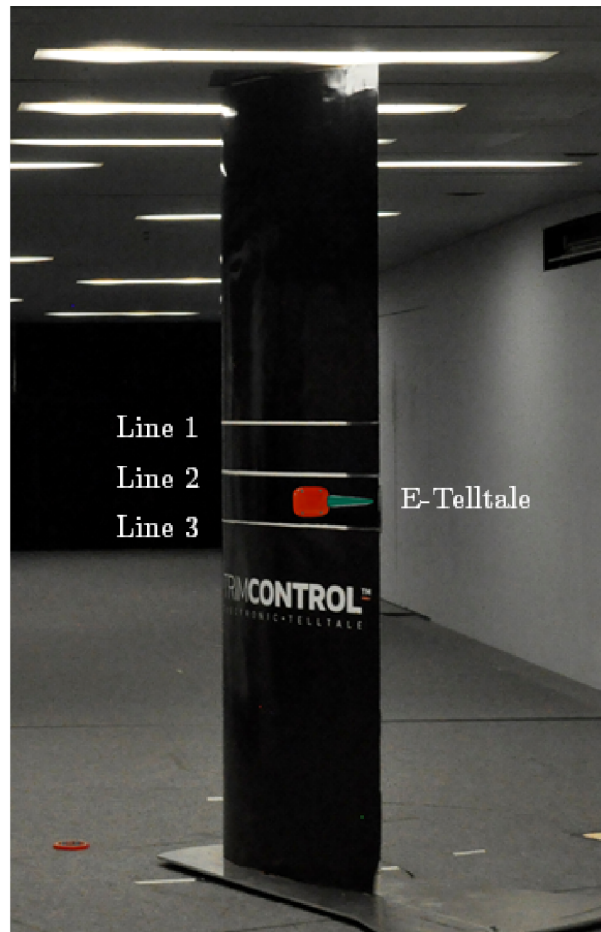

a)

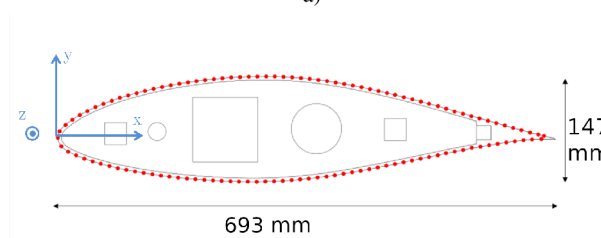

b)

**Figure 3.** a) Positions of the chord-wise pressure lines along the span b) positions of pressure taps around the chord

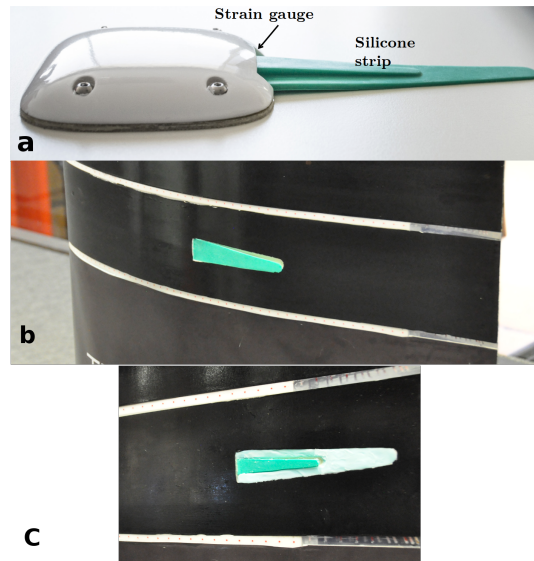

**Figure 4.** Picture of the innovative E-Telltale sensor (a : Shell and long strip cases of Table 1, b : no shell and long strip cases of Table 1, c TENSS case of Table 1) .

In the present study, which is a first high Reynolds number wind tunnel evaluation of this innovative e-Telltale sensor, we focuses on the ability of the e-Telltale sensors to detect mean load variations highlighted by the lift coefficient evolution versus the AoA and related to the flow separation over the suction side surface of the blade described in section 3. Different parameters of the e-Telltale sensor were investigated and summarized in table 1. The first question that arises for such local sensors is where to place them on operating turbines. For this reduced problem (2D blade model), this question can be summarized as follows: which sensor positions are the best to detect the angles at which separation occurs ? Two locations will be targeted as this blade profile shape has two types of flow separation (see section 3 for more details): the flow separation at the trailing edge and the flow separation at the leading edge. Therefore, the end of the strip is first located at 95.6% from the leading edge, the Trailing edge or TE case, and at 31.8% from the leading edge, the Leading-edge or LE case (see figure 5). The TE position is slightly modified for shorter strips so that the end of the strip is at 87.6% from the leading edge rather than 95.6% (see figure 5). Another question we target to answer in this study is the ability of this device to detect flow separation for two different surface fitting processes. The first e-Telltale is equipped with an aerodynamic shell that is glued on the surface, the Shell or S case. The second e-Telltale is integrated in the surface of the airfoil so that the surface of the airfoil is less perturbed, the NoShell or NS case. The shell case is generally mounted on wind turbines already in operation, while the NoShell case could be part of the blade manufacturing process. As a first evaluation of this parameter, the length of strip is divided by almost two by keeping only the central part of the strip that is thicker (see figure 4 and 7). Between the two cases, the surface/thickness ratio is modified from 921 mm to 218 mm. The two cases will be referred later as the long (or L) and short (or S) strip.



| Name             | Short Name | Location                     | Shape         | Size ( $L/c$ ) |
|------------------|------------|------------------------------|---------------|----------------|
| TE-Shell-Long    | TESL       | Trailing edge (see figure 5) | with shell    | 0.19           |
| TE-NoShell-Long  | TENSL      | Trailing edge (see figure 6) | without shell | 0.19           |
| LE-NoShell-Long  | LENSL      | Leading edge (see figure 6)  | without shell | 0.19           |
| TE-NoShell-Short | TENSS      | Trailing edge (see figure 7) | without shell | 0.11           |

**Table 1.** e-Telltale configurations (with  $L$  the length of the silicon strip and  $c$  the chord of the profile)

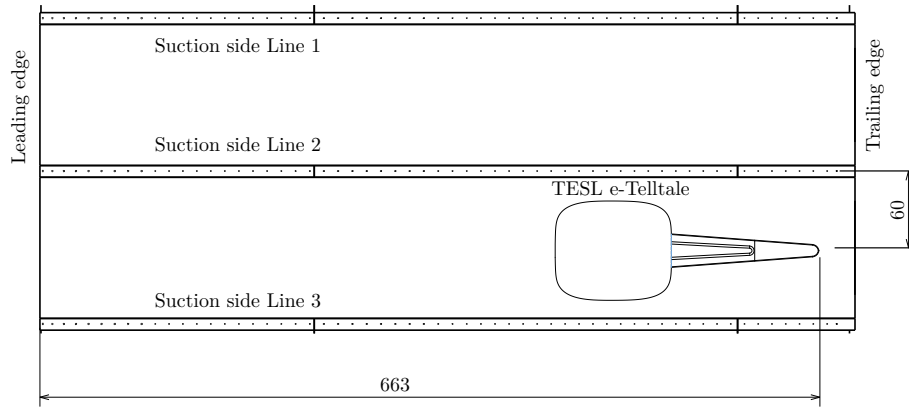

**Figure 5.** Position of the TESL e-Telltale

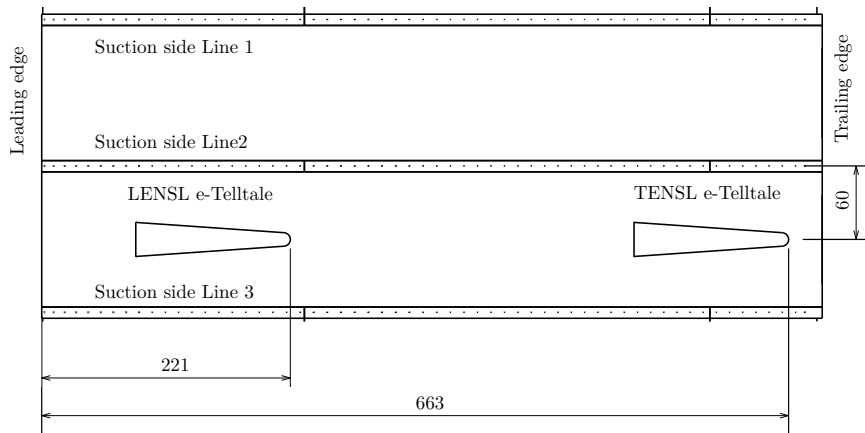

**Figure 6.** Positions of LENS and TENS e-Telltales

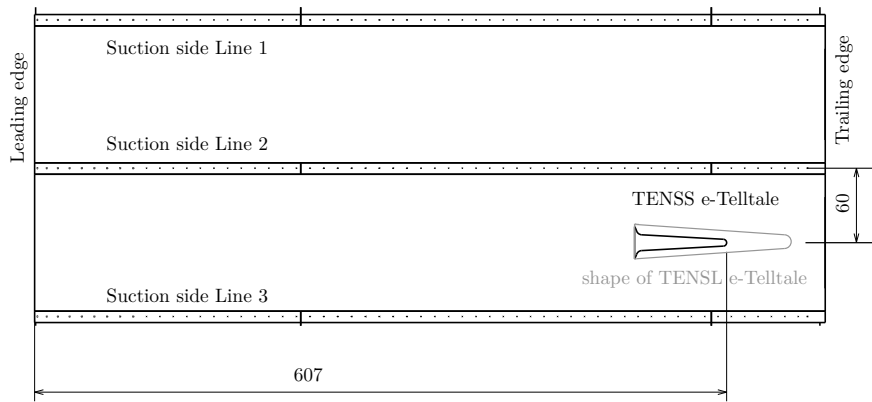

**Figure 7.** Position of TENS e-Telltale

### 3 Blade aerodynamics

90 The NACA-65<sub>4</sub>-421 profile has different slope modifications of the static lift coefficient corresponding to different states of flow on the suction side surface of the airfoil. This profile was already studied in the work of (Devinant et al., 2002) and a modified version (rounded trailing edge) of this NACA profile was used in the ANR (French national grant) project SMARTEOLE (Leroy, 2018; Braud and Guilmineau, 2016; Baleriola et al., 2018; Jaunet and Braud, 2018).

Measurements of the present study were performed with a turbulence intensity of 1%, which may be at the origin of some  
 95 discrepancies in the exact values of the separations angles from the different studies on the same profile (Devinant et al., 2002). However, similarly to previous studies, this profile shape presents different states of the flow depending on the AoA that have an impact on the shape of the lift curve and on the chord-wise pressure distribution. **Figures 8 and 9 show lift coefficient and pressure coefficient of the average of the 3 lines of pressure taps, there are used for a rough description of the flow state with the AoA for this airfoil shape as there exist many scenarios according to Gault (1957):**

- 100 – Until  $AoA \simeq 6^\circ$ , the lift rises linearly with the AoA, the flow is attached to the surface of the profile **as seen on the pressure distribution with no area of constant pressure on the suction side of the trailing edge.**
- Between  $AoA \simeq 6^\circ$  to  $8^\circ$ , the flow is transitioning from the **attached state to the separated** state, as can be seen on the trailing edge suction side of the airfoil from the intermittent appearance of a plateau on the pressure distribution (corresponding to a zero gradient pressure) **This plateau can be seen on the zoom of the pressure distribution At  $AoA = 8^\circ$ .**
- 105 – From  $AoA \simeq 8^\circ$  to  $17^\circ$ , the flow separation can now be observed in average and move progressively towards the leading edge. This corresponds to a linear evolution of the lift with the AoA, with however a smaller slope than the previous flow state.

- From  $17^\circ$  to  $AoA \simeq 20^\circ$ , the evolution of the separation point towards the leading edge is faster and not linear, the flow is transitioning towards stall. On the pressure distributions at  $AoA = 17^\circ$  and  $AoA = 20^\circ$  a large plateau of constant wall pressure can be seen on the suction side of the profile showing that the flow separation location is really close to the leading edge.
- Over  $AoA \simeq 21^\circ$  the separation point has reached the leading edge area, the flow is stalled and the wall pressure is almost constant on the whole suction side. The flow behaves like an asymmetric bluff body with shear layers on each side of the profile (from the leading edge and the trailing edge), a recirculating area in the close wake, and a wake behavior further downstream. Form the lift curve, the flow can be considered as a stalled flow

These flow states correspond to a progressive displacement of the mean flow separation from the trailing edge to the leading edge, until the stall occurs, a typical scenario found for thick airfoil shapes by Gault (1957). It should be noted that, near the transitioning regions (around  $AoA 8^\circ$  or near stall) the flow becomes 3D as highlighted by (Manolesos et al., 2014; Bak et al., 1999), leading to discrepancies that are still under investigations (Olsen et al., 2020). Therefore, for consistency, the pressure measurements were acquired simultaneously with the e-Telltale sensor signal and there are presented with the e-Telltale signal. Also, an average of the two chordwise pressure lines that surround the sensor e-Telltale sensor is used for the following plots.

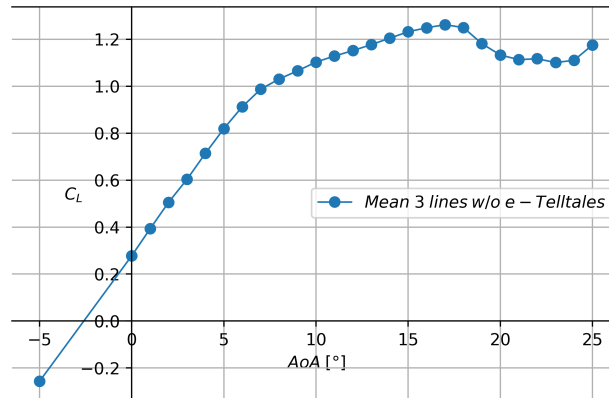

**Figure 8.** Lift coefficient mean of 3 lines

## 4 Results

During these experiments the attention was drawn to evaluate the ability of the e-Telltale to detect the slope changes on  $C_L$  corresponding to the flow separation at the trailing edge ( $AoA \simeq 8^\circ$ ) and the leading edge flow separation, corresponding to the stall angle ( $AoA \simeq 21^\circ$ ) as explained in section 3. Each modification of the lift slope corresponds to an evolution of the flow separation state, which ideally induces a different movement of the e-Telltale strip and thus a difference in the strain gauge

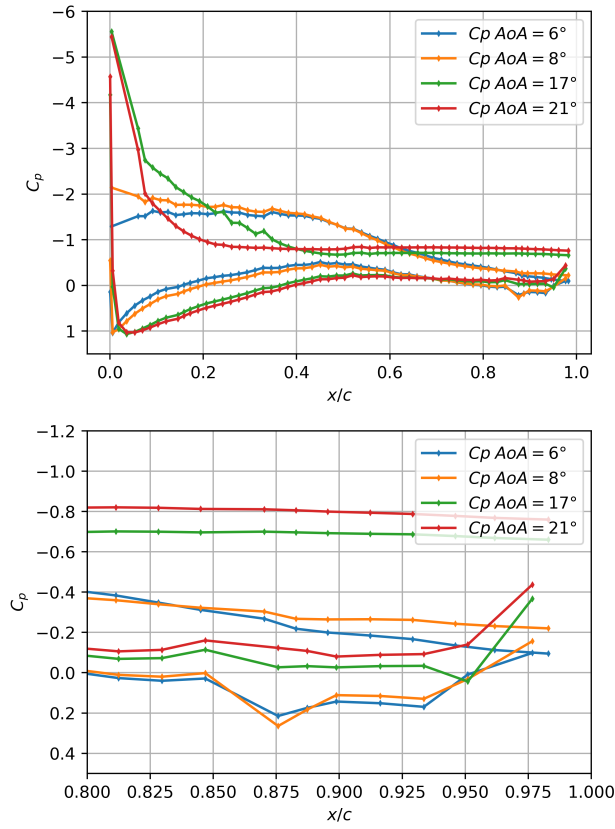

**Figure 9.** Pressure coefficient  $C_P$  average on the 3 lines of pressure taps for  $AoA = 6^\circ, 8^\circ, 17^\circ, 21^\circ$ , the left plot is a zoom on the trailing edge

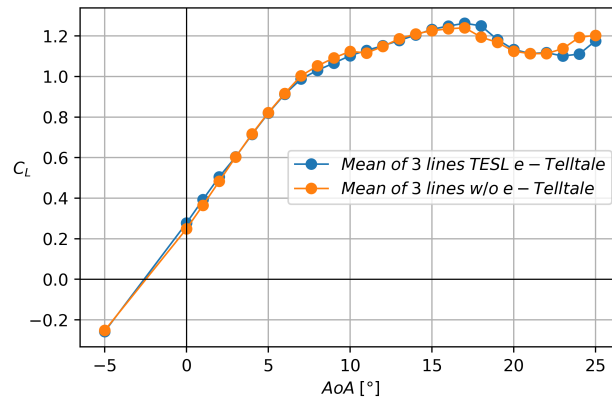

**Figure 10.** Lift coefficient without e-Telltale and with the TESL e-Telltale

signal of the e-Telltale device. In this section, the time averaged strain gauge signal and the standard deviation are computed for each AoA and presented together with the **corresponding lift curve**.

#### 130 4.1 The reference case (TENSL)

In order to compare different parameters of the e-Telltale (as presented in the tabular 1) the TENSL configuration (near the trailing edge, no shell, long strip) was selected as the reference case. The figure 11 shows the evolution of the mean and the standard deviation of the signal of the e-Telltale corresponding to the TENSL case as function of  $AoA$ . The lift curve is plotted together to allow us to locate the state of the flow with the  $AoA$ s which are recalled in the figure. From  $-5^\circ$  to  $5^\circ$ , the linear  
135 evolution of the lift indicates an attached flow state. For this  $AoA$  range, both the mean and the standard deviation of the signal of the e-Telltale are near 0. From  $5^\circ$  to  $8^\circ$ , corresponding to the flow separation appearance at the trailing edge, both the mean and the standard deviation rise up linearly with the  $AoA$ . Then from  $8^\circ$  to  $10^\circ$  they decrease linearly to values near 0. Interestingly, the e-Telltale has a particular sensitivity to the transition flow state from the fully attached flow to the trailing edge flow separation. The advantage of this observation is to make this innovative sensor appropriated to predict the trailing  
140 edge flow separation, at least for this type of profile. At  $AoA > 10^\circ$ , both the mean and the standard deviation of the e-Telltale signal increases again until  $AoA = 18^\circ$ . Contrary to the  $AoA$  range corresponding to the appearance of the trailing edge flow separation, between  $AoA = 5^\circ$  to  $AoA = 8^\circ$ , the evolution is not linear. A progressive saturation of the signal appears slowly. This may be explained by the displacement of the separation point and its associated shear layer, that are moving further away from the sensor with the increase of the  $AoA$ . Between  $AoA = 18^\circ$  and  $AoA = 20^\circ$  the e-Telltale signal is marked by a sudden  
145 rise in two steps. A first moderate step between  $18^\circ$  and  $20^\circ$  and a sudden rise between  $20^\circ$  to  $21^\circ$ . This can be explained by the strip that is flipping towards the leading edge due to the strength of the reverse flow after  $20^\circ$ , in good agreement with low Reynolds number experiments performed by Soulier et al (Soulier et al., 2021). After the stall angle,  $AoA = 21^\circ$ , the mean signal reaches its maximum value while the standard deviation has doubled. This indicates that the strip is not only flipping in the reverse flow in average, but it is also fluctuating in the flow with larger oscillation than when the stall has occurred, again  
150 in good agreement with low Reynolds number observations (Soulier et al., 2021). The significant rise which occurs at the stall angle allows a clear detection of the stall angle with the e-Telltale sensor, even though not ahead its appearance. After this  $AoA$  of  $21^\circ$ , the stalled flow or the bluff-body flow is settled, both the mean and the standard deviation of the e-Telltale signal are linearly decreasing, probably due to the deportation of the shear layer further away from the location of the e-Telltale.

#### 4.2 Influence of the strip stiffness or length (TENSS case)

155 Compared to the previous case (section 4.1), the TENSS case presents a shorter strip length, reduction of 58% ( $L_{TENSL}/c = 0.19$  and  $L_{TENSS}/c = 0.11$ ,  $L$  : length of the strip), and a more rigid strip measured through the surface-thickness ratio reduction of 77% (from  $A_{TENSL}/T_{TENSL} = 921 \text{ mm}$  to  $A_{TENSS}/T_{TENSS} = 218 \text{ mm}$ ,  $A$ ,  $A$  : Area of the strip,  $T$  : Thickness of the strip), which parameter is inversely proportional to the stiffness of the strip. The short strip is therefore much stiffer than the long one.

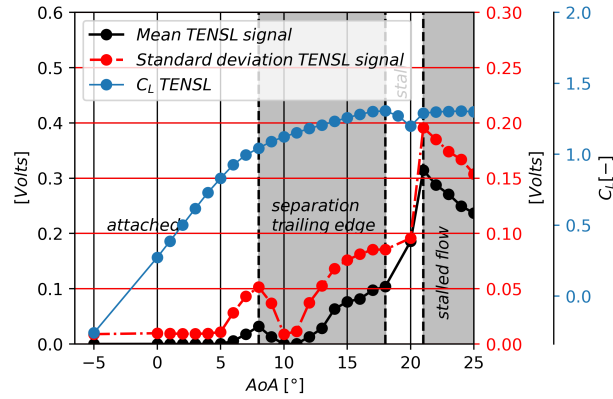

**Figure 11.** Mean and Standard deviation of the e-Telltale TENSLE signal and lift  $C_L$  as function of  $AoA$

160 The e-Telltale is located at the same position of the reference TENSLE case (the root of the strip at around 77% of the chord). For this test, the same device is used but the strip has been cut, ensuring that the strain gauge and the position of the strip are identical to the reference case. The figures 12a and 12b show respectively the mean and standard deviation of the TENSLE case signal versus the  $AoA$ , plotted together with the reference case. It clearly shows that there is almost no information about the stall with the shorter strip case (i.e. for  $AoA > 19^\circ$ ), only a slight increase of the standard deviation value with a peak around

165 21° is observed (see figure 12b). On the contrary, for  $AoA$ s corresponding to the appearance of the flow separation at the trailing edge, from  $AoA = 5^\circ$  to  $AoA = 8^\circ$ , the mean signal is 1.5 higher than the reference case (longer strip case). Also, the mean and standard deviation of the signal suddenly drops at  $AoA = 9^\circ$ . Having a higher sensitivity of the strain gauge signal for the shorter strip case which is stiffer, highlights that the length of the strip is the most relevant parameter for the detection of trailing edge separation phenomena of this profile. For the stall phenomena it seems that the reversed flow close to the wall

170 is not the relevant phenomena at the origin of the displacement of the strip, but rather the separated shear layer and its distance to the wall. However, further spatio-temporal explorations are needed to investigate this point. For further understanding of full scale blade aerodynamics, the high sensitivity of the short sensor case to the appearance of the trailing edge separation and not the stall, makes it really interesting to discriminate them.

#### 4.3 Influence of the position of the e-Telltale (LENSL)

175 The influence of the position of the e-Telltale is discussed in this section. The e-Telltale located near the leading edge in the area of high favorable pressure gradient, the LENSLE case, is compared to the reference case, at the trailing edge (see figure 6) in the figure 13. When located at the leading edge, the e-Telltale is clearly unable to detect the  $AoA$  corresponding to the trailing edge flow separation,  $AoA = 8^\circ$ . On the contrary, both the mean and the standard deviation of the signal starts to rise just after the second linear part of the lift,  $AoA = 17^\circ$ , with a stronger slope than when the e-Telltale is located at the trailing

180 edge. It leads to a higher level of the signal, more than doubled for the mean signal, and around 50% higher for the standard

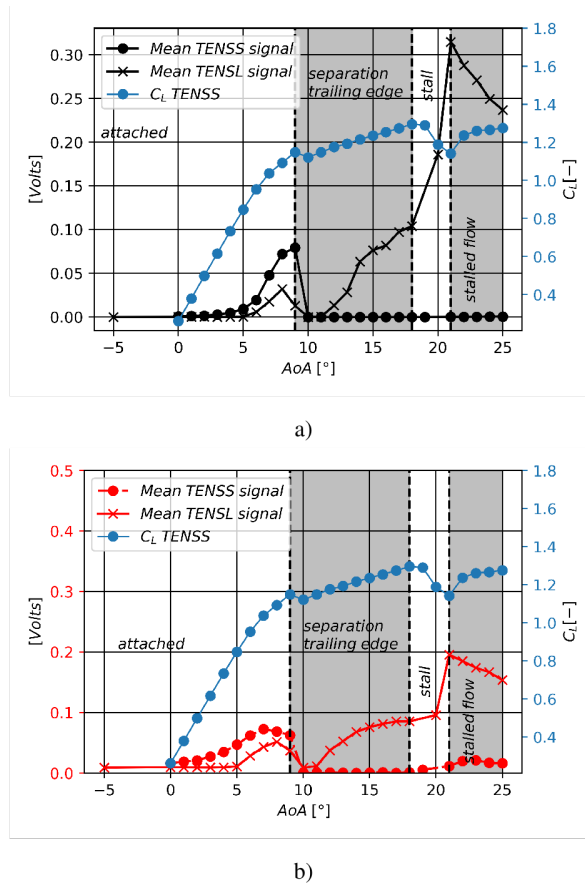

**Figure 12.** Comparison of the mean a) and the standard deviation b) of the signal of the TENSLS (reference case) and TENS e-Telltales as function of  $AoA$

deviation. Also, the peak of the signal occurs at higher AoAs than when the sensor is located at the trailing edge. All these observations are **pretty obvious as there are** in good agreement with the fact that the stall phenomena is originated at the leading edge, with a separated shear layer that remains, for the sensor located near the leading edge, close to the wall and thus close to the sensor, even at high AoA. Due to its strong signal value, this configuration is well suited to detect the stall phenomena compared to other e-Telltale cases.

#### 4.4 Influence of the shell (TESL case)

The figure 14a and 14b show respectively the mean and standard deviation of the TESL case versus the AoA, compared with the reference case. The magnitude of both, the mean and standard deviation is larger considering both the trailing edge separation and the leading edge flow separation angles. However, both phenomena are detected at higher  $AoA$ ,  $AoA = 9^\circ$  and  $AoA \simeq 22 - 23^\circ$  respectively, when compared with the sensor integrated in the aerodynamic surface. **We cannot explain the**

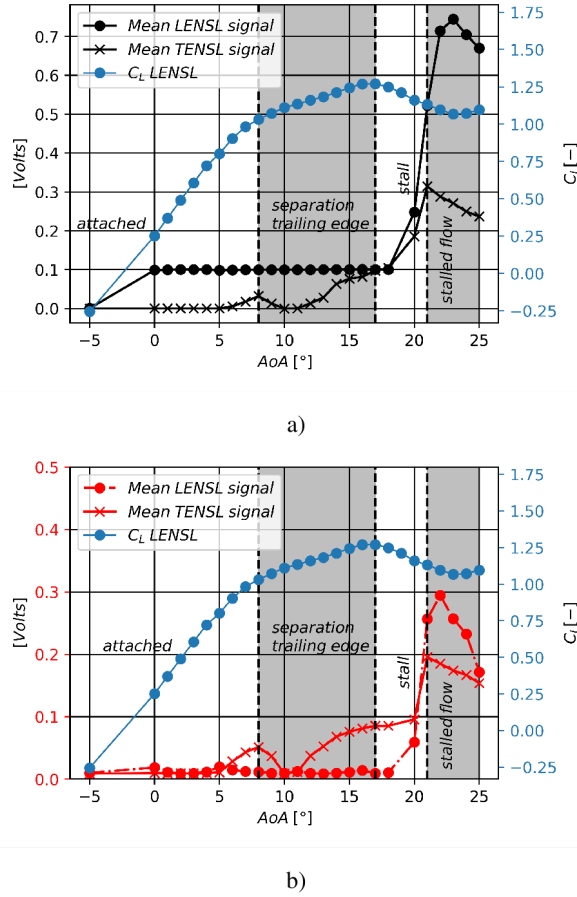

**Figure 13.** Comparison of the mean a) and the standard deviation b) of the signal of the LENS and TENS (reference case) e-Telltales as function of  $AoA$

measured differences between the two configurations with the available measurements. However, it is interesting to point out that the obvious difference between the two configurations cannot be seen in the lift level (figure 10). Too many parameters are involved here to conclude. It should however be noticed that the strip of the e-Telltale in the integrated case was observed to have difficulties to initiate a movement. This may be attributed to a complex interaction between the boundary layer with the cavity in which the sensor is integrated.

## 5 Conclusion

In order to evaluate the ability of an innovative aerodynamic sensor, the e-Telltale, to detect the flow separation on wind turbine blades, high Reynolds number wind tunnel tests ( $Re_c = 8.85 \cdot 10^5$ ) were performed on a 2D blade section using a full scale e-Telltale sensor. This innovative sensor is made of a strip with a strain gauge at its base, detecting displacement



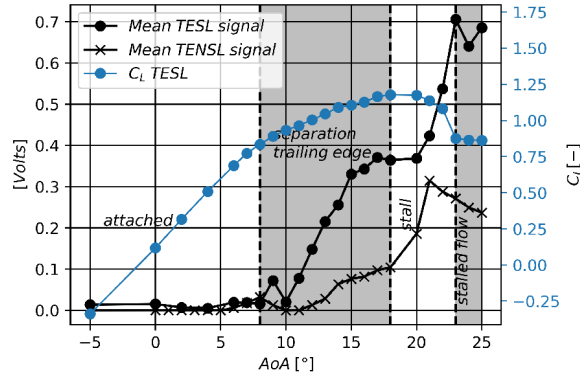

a)

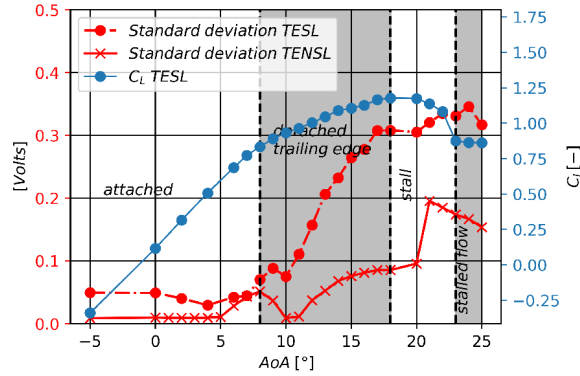

b)

**Figure 14.** Comparison of the mean a) and the standard deviation b) of the signal of the TESL and TENSLE e-Telltales as function of  $AoA$

200 of the strip away from the aerodynamic surface. These tests highlight the impact of different parameters on the signal of the e-Telltale, and also the possible different use of the sensor in agreement with these findings. First, the e-Telltale with a long strip located at the trailing edge is able to detect both the trailing flow separation angle and the stall angle. This e-Telltale detects only the stall angle when located at the leading edge, with however a higher amplitude in the mean and standard deviation of the sensor's signal. For a sensor located at the trailing edge, the strip can be shortened to only detect the trailing

205 edge separation angle with a higher sensitivity, this configuration being however ineffective to detect the stall angle. The limit size of the strip have not been identified yet but a relative length of  $L_{TENSLE}/c = 0.11$  (associated with a thickness ratio of  $A_{TENSLE}/T_{TENSLE} = 218 \text{ mm}$ ) is short enough for that purpose while a length of  $L_{TENSSE}/c = 0.19$  (associated with a thickness ratio of  $A_{TENSSE}/T_{TENSSE} = 218 \text{ mm}$ ) is too long. When the e-Telltale is not integrated to the aerodynamic surface, which may concern all the wind turbines already in operation, the same conclusions can be drawn: this sensor is able to detect

210 both the trailing edge flow separation angle and the stall angle with however a slight delay in the detection of the trailing

edge separation regarding the lift curve used as the reference. This delay in the detection of flow separation by the e-Telltale have been addressed at a smaller scale in (Soulier et al., 2021). However some future measurement are needed at full scale to complete the study of the delay.

215 *Author contributions.* This work was performed during the PhD of AS under the supervision of CB, DV and FD. CB provided her scientific expertise in turbulent shear flows and wind turbine blade aerodynamics, DV shared his expertise on the innovative e-Telltale sensor, FD supervised the wind tunnel experiments at CSTB.

*Competing interests.* No conflict of interest.

*Acknowledgements.* Authors would like to thanks the technical staff at CSTB who carried experiments in the NSA wind tunnel.

## References

- 220 Bak, C., Madsen, H. A., Fuglsang, P., and Rasmussen, F.: Observations and hypothesis of double stall, *Wind Energy*, 2, 195–210, [https://doi.org/https://doi.org/10.1002/1099-1824\(199910/12\)2:4<195::AID-WE27>3.0.CO;2-7](https://doi.org/https://doi.org/10.1002/1099-1824(199910/12)2:4<195::AID-WE27>3.0.CO;2-7), <https://onlinelibrary.wiley.com/doi/abs/10.1002/1099-1824%28199910/12%292%3A4%3C195%3A%3AAID-WE27%3E3.0.CO%3B2-7>, [\\_eprint: https://onlinelibrary.wiley.com/doi/pdf/10.1002/1099-1824%28199910/12%292%3A4%3C195%3A%3AAID-WE27%3E3.0.CO%3B2-7](https://onlinelibrary.wiley.com/doi/pdf/10.1002/1099-1824%28199910/12%292%3A4%3C195%3A%3AAID-WE27%3E3.0.CO%3B2-7), 1999.
- 225 Baleriola, S., Leroy, A., Loyer, S., Devinant, P., and Aubrun, S.: Experimental lift control using fluidic jets on a model wind turbine, *Journal of Physics: Conference Series*, 1037, 022 014, <https://doi.org/10.1088/1742-6596/1037/2/022014>, <https://iopscience.iop.org/article/10.1088/1742-6596/1037/2/022014>, 2018.
- Bartholomay, S., Michos, G., Perez-Becker, S., Pechlivanoglou, G., Nayeri, C., Nikolaouk, G., and Paschereit, C. O.: Towards Active Flow Control on a Research Scale Wind Turbine Using PID controlled Trailing Edge Flaps, 2018 Wind Energy Symposium, <https://arc.aiaa.org/doi/abs/10.2514/6.2018-1245>.
- 230 Braud, C. and Guilmineau, E.: Jet flow control at the blade scale to manipulate lift, *Journal of Physics: Conference Series*, 753, 022 031, <https://doi.org/10.1088/1742-6596/753/2/022031>, <https://iopscience.iop.org/article/10.1088/1742-6596/753/2/022031>, 2016.
- Chamorro, L. P., Guala, M., Arndt, R. E. A., and Sotiropoulos, F.: On the evolution of turbulent scales in the wake of a wind turbine model, *Journal of Turbulence*, N27, 2012.
- 235 Devinant, P., Laverne, T., and Hureau, J.: Experimental study of wind-turbine airfoil aerodynamics in high turbulence, *Journal of Wind Engineering and Industrial Aerodynamics*, 90, 689–707, <http://www.sciencedirect.com/science/article/pii/S0167610502001629>, 2002.
- Gault, D. E.: A correlation of low-speed airfoil-section stalling characteristics with Reynolds number and airfoil geometry, Tech. Rep. Technical note 3963, National Advisory Committee for Aeronautics, 1957.
- Jaunet, V. and Braud, C.: Experiments on lift dynamics and feedback control of a wind turbine blade section, *Renewable Energy*, 126, 65–78, <https://doi.org/10.1016/j.renene.2018.03.017>, <http://www.sciencedirect.com/science/article/pii/S0960148118303227>, 2018.
- 240 Leroy, V.: Unsteady aerodynamic modelling for seakeeping analysis of Floating Offshore Wind Turbines, <https://tel.archives-ouvertes.fr/tel-02090543>, 2018.
- Manolesos, M., Papadakis, G., and Voutsinas, S.: An experimental and numerical investigation on the formation of stall-cells on airfoils, *Journal of Physics: Conference Series*, 555, 012 068, <https://doi.org/10.1088/1742-6596/555/1/012068>, <https://doi.org/10.1088/1742-6596/555/1/012068>, publisher: IOP Publishing, 2014.
- 245 Olsen, A. S., Sørensen, N. N., Bak, C., Gaunaa, M., Mikkelsen, R., Fischer, A., Beckerlee, J., and Ildvedsen, S.: Why is the measured maximum lift in wind tunnels dependent on the measurement method?, *Journal of Physics: Conference Series*, 1618, 032 040, <https://doi.org/10.1088/1742-6596/1618/3/032040>, <https://doi.org/10.1088/1742-6596/1618/3/032040>, publisher: IOP Publishing, 2020.
- Pedersen, T. F., Demurtas, G., and Zahle, F.: Calibration of a spinner anemometer for yaw misalignment measurements, *Wind Energy*, 18, 1933–1952, <https://doi.org/10.1002/we.1798>, <https://onlinelibrary.wiley.com/doi/abs/10.1002/we.1798>, 2015.
- 250 Rezaeiha, A., Pereira, R., and Kotsonis, M.: Fluctuations of angle of attack and lift coefficient and the resultant fatigue loads for a large Horizontal Axis Wind turbine, *Renewable Energy*, 114, 904–916, <https://doi.org/10.1016/j.renene.2017.07.101>, <http://www.sciencedirect.com/science/article/pii/S0960148117307280>, 2017.
- Scholbrock, A., Fleming, P., Fingersh, L., Wright, A., Schlipf, D., Haizmann, F., Belen, F., and others: Field testing LIDAR based feed-forward controls on the NREL controls advanced research turbine, 51th AIAA Aerospace Sciences Meeting Including the New Horizons
- 255

- Forum and Aerospace Exposition, Grapevine, Texas, <https://pdfs.semanticscholar.org/893c/541585d70004b30b357425f05ac7b1f75477.pdf>, 2013.
- 260 Shaqarin, T., Braud, C., and Coudert, S.: Open and closed-loop experiments to identify the separated flow dynamics of a thick turbulent boundary layer, *Exp Fluids*, 54, 1448, <https://doi.org/10.1007/s00348-012-1448-4>, <https://ui.adsabs.harvard.edu/abs/2013ExFl...54.1448S/abstract>, 2013.
- Sicot, C., Devinant, P., Loyer, S., and Hureau, J.: Rotational and turbulence effects on a wind turbine blade. Investigation of the stall mechanisms, *Journal of Wind Engineering and Industrial Aerodynamics*, 96, 1320–1331, <https://doi.org/10.1016/j.jweia.2008.01.013>, <http://linkinghub.elsevier.com/retrieve/pii/S0167610508000871>, 2008.
- 265 Smaïli, A. and Masson, C.: On the rotor effects upon nacelle anemometry for wind turbines, *Wind Engineering*, 28, 695–713, <http://journals.sagepub.com/doi/abs/10.1260/0309524043729958>, 2004.
- Soulier, A., Braud, C., Voisin, D., and Podvin, B.: Low-Reynolds-number investigations on the ability of the strip of e-TellTale sensor to detect the flow features over wind turbine blade section: flow stall and reattachment dynamics, *Wind Energy Science*, 6, 409–426, <https://doi.org/10.5194/wes-6-409-2021>, <https://wes.copernicus.org/articles/6/409/2021/>, 2021.
- 270 Swytink-Binnema, N. and Johnson, D. A.: Digital tuft analysis of stall on operational wind turbines: Digital tuft analysis of stall on operational wind turbines, *Wind Energy*, 19, 703–715, <https://doi.org/10.1002/we.1860>, <http://doi.wiley.com/10.1002/we.1860>, 2016.
